# Supplementary material for: Efficient biodegradation of malachite green by an artificial enzyme designed in myoglobin
Source: Royal Society of Chemistry journal article supplement (doi:10.1039/d1ra02202d), 2021-01-01
Supplement: d1ra02202d1.pdf [file d1ra02202d1.pdf]

**Supporting Information for**  
**Efficient biodegradation of malachite green by an artificial enzyme**  
**designed in myoglobin**

Heng-Fang Xiang,<sup>a</sup> Jia-Kun Xu,<sup>b\*</sup> Jiao Liu,<sup>a</sup> Xin-Zhi Yang<sup>c</sup>, Shu-Qin Gao,<sup>c</sup> Ge-Bo Wen,<sup>c</sup> and  
Ying-Wu Lin<sup>a,c\*</sup>

<sup>a</sup> *School of Chemistry and Chemical Engineering, University of South China, Hengyang 421001, China*

<sup>b</sup> *Key Lab of Sustainable Development of Polar Fisheries, Ministry of Agriculture and Rural Affairs, Yellow Sea Fisheries Research Institute, Chinese Academy of Fishery Sciences, Lab for Marine Drugs and Byproducts of Pilot National Lab for Marine Science and Technology, Qingdao 266071, China*

<sup>c</sup> *Laboratory of Protein Structure and Function, University of South China Medical School, Hengyang 421001, China*

Corresponding authors:

\*E-mail: ywlin@usc.edu.cn (Y.-W. Lin); xujk@ysfri.ac.cn (J.-K. Xu)

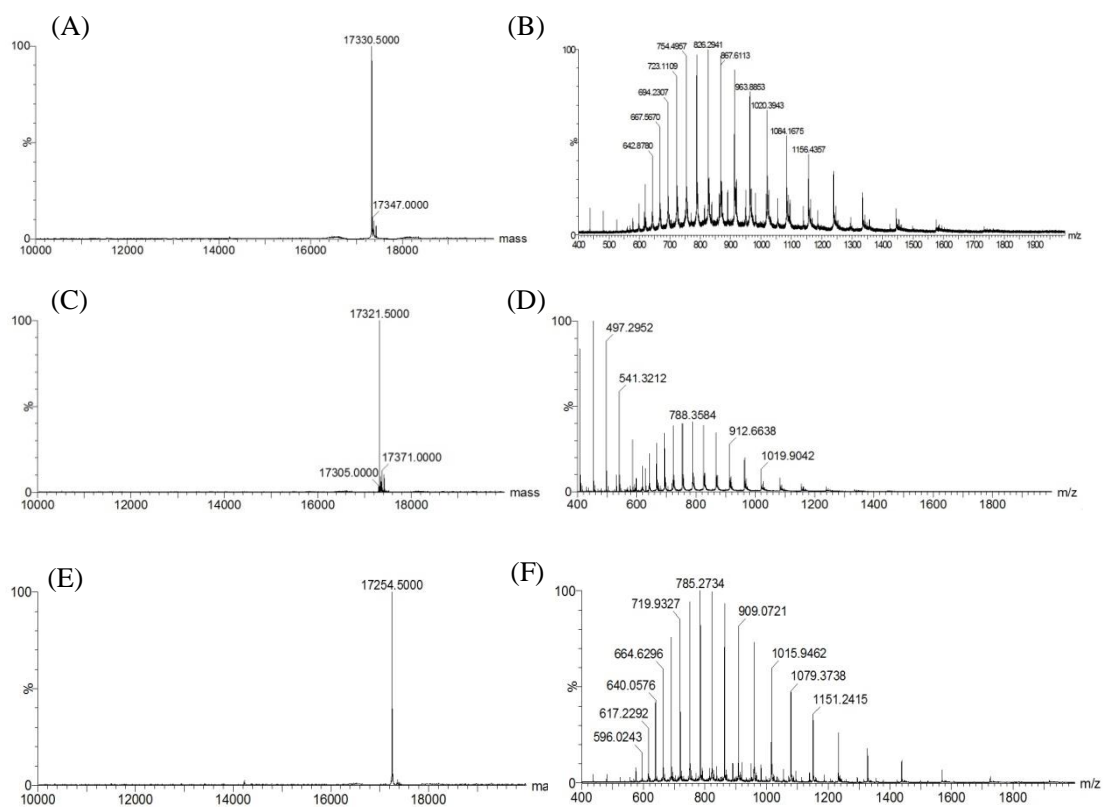

**Figure S1.** Mass spectra of WT Mb (A, B), F43H Mb (C, D) and F43H/H64A Mb (E, F), and the calculated molecular weight is 17,330.50 Da, 17321.05 Da and 17254.99 Da, respectively. The observed molecular weight is  $17331 \pm 0.5$  Da,  $17321.5 \pm 0.5$  Da and  $17254.0 \pm 0.5$  Da, respectively.

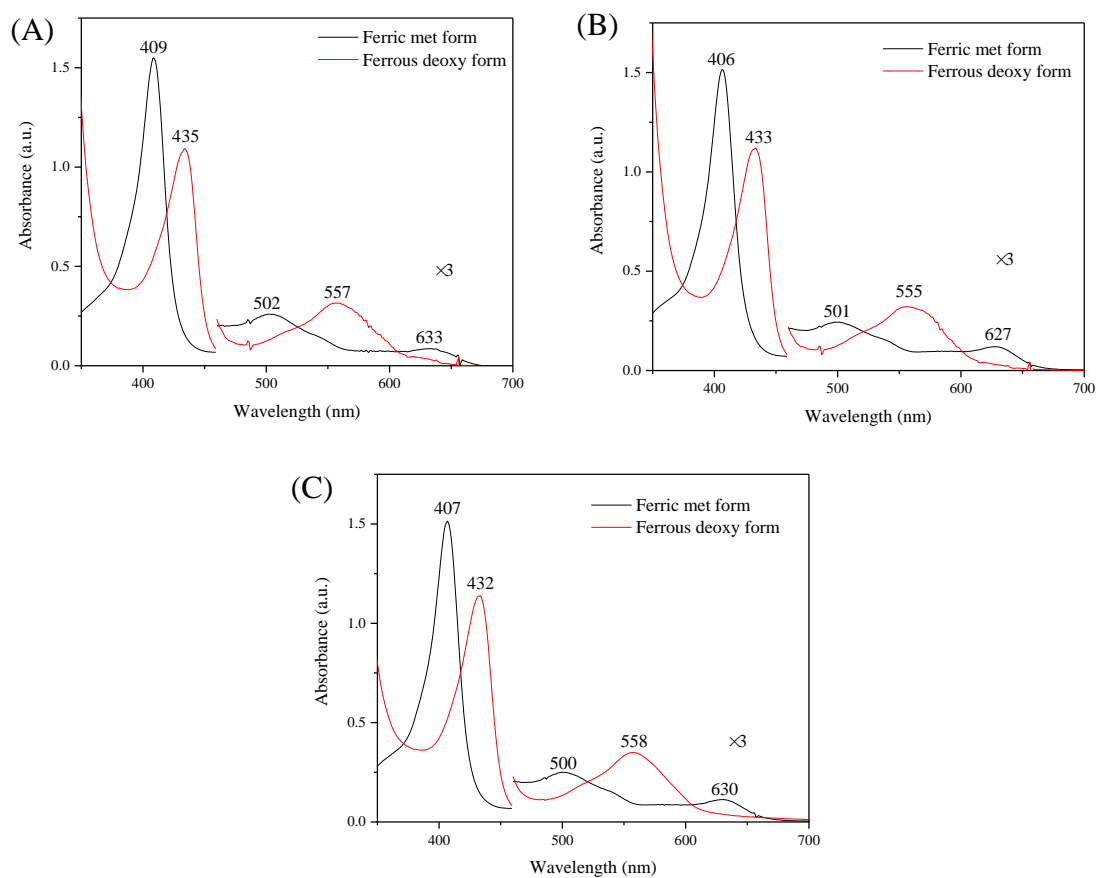

**Figure S2.** UV-Vis spectra of WT Mb (A), F43H Mb (B) and F43H/H64A Mb (C) in the ferric met form (black) and ferrous doxy form (red), respectively.

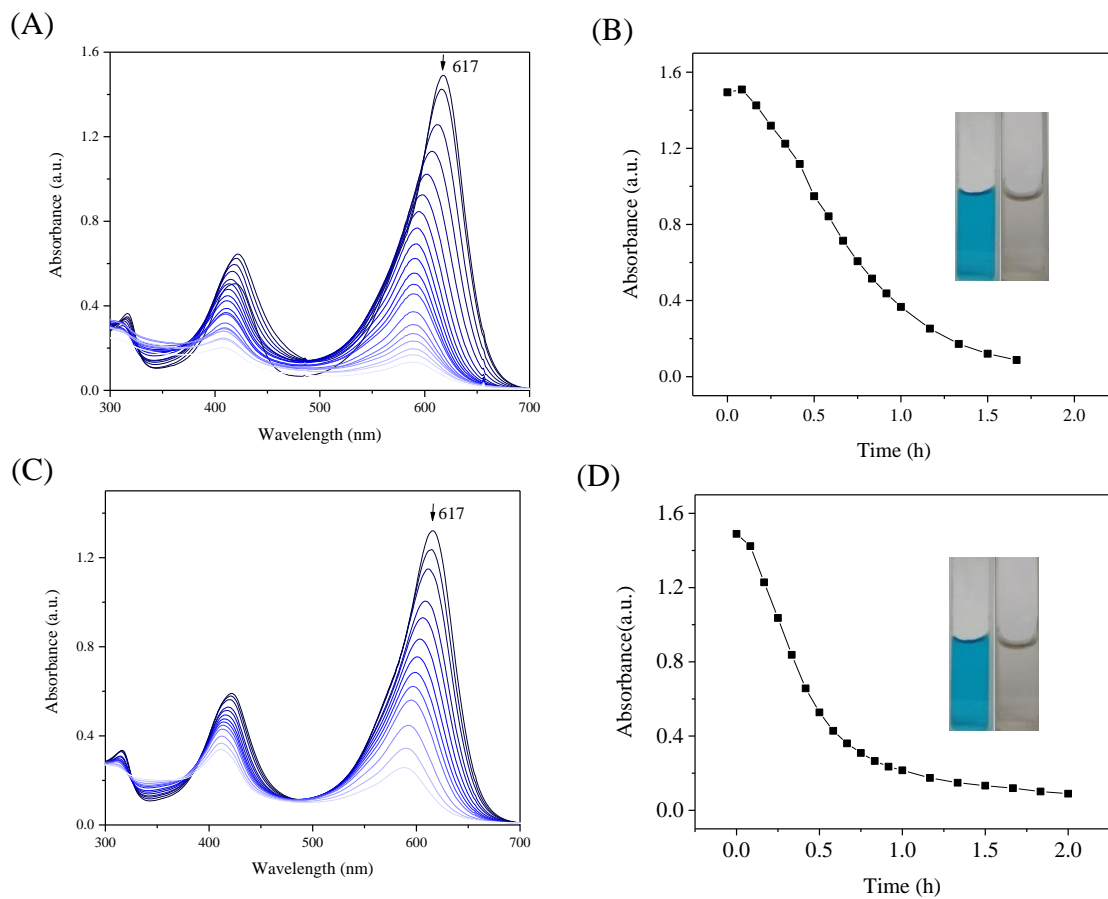

**Figure S3.** UV-Vis spectra of MG (10 μM) oxidized by WT Mb (A) and F43H Mb (C) (2 μM) with H<sub>2</sub>O<sub>2</sub> (200 μM) in KPi buffer (100 mM, pH 6.0) at 25 °C for 2 h. Kinetic changes of absorption at 617 nm upon oxidation of MG catalyzed by WT Mb (B) and F43H Mb (D). The digital photos of the solution before and after reaction were shown as insets.

**Table S1** Docking results of MG to F43H/H64A Mb AutoDock program

| Model | $E_{\text{binding}}^{\text{a}}$ | $E_{\text{inter-mol}}^{\text{b}}$ | $E_{\text{vdw}}^{\text{c}}$ | $E_{\text{elec}}^{\text{d}}$ |
|-------|---------------------------------|-----------------------------------|-----------------------------|------------------------------|
| 1     | -5.35                           | -6.54                             | -0.30                       | 0.01                         |
| 2     | -5.35                           | -6.54                             | -0.27                       | 0.01                         |
| 3     | -5.35                           | -6.54                             | -0.32                       | 0.00                         |
| 4     | -5.35                           | -6.54                             | -0.28                       | 0.01                         |
| 5     | -5.35                           | -6.55                             | -0.27                       | 0.02                         |
| 6     | -5.35                           | -6.54                             | -0.31                       | 0.01                         |
| 7     | -5.34                           | -6.54                             | -0.29                       | 0.01                         |
| 8     | -5.34                           | -6.54                             | -0.32                       | 0.00                         |
| 9     | -5.34                           | -6.54                             | -0.36                       | 0.00                         |
| 10    | -5.33                           | -6.53                             | -0.33                       | 0.01                         |

<sup>a</sup> Binding energy. <sup>b</sup> Intermolecular energy. <sup>c</sup> van der Waals energies. <sup>d</sup> Electrostatic interactions.
